# Supplementary material for: Associations of Computed Tomography Image-Assessed Adiposity and Skeletal Muscles with Triple-Negative Breast Cancer
Source: MDPI journal article supplement (doi:10.3390/cancers14071846), 2022-04-06
Supplement: s1 [file s1]

**Table S1. Odds ratio (OR) and 95% confidence interval (CI) for the association between specific body composition components and triple-negative breast cancer (TNBC) subtype among patients with pre-surgery computed tomography (CT) scans (N=121).**

| <b>Body composition</b>             | <b>Model 1<br/>Unadjusted OR<br/>(95% CI)</b> | <b>Model 2<br/>Adjusted OR<sup>a</sup><br/>(95% CI)</b> | <b>Model 3<br/>Adjusted OR<sup>b</sup> (95%<br/>CI)</b> |
|-------------------------------------|-----------------------------------------------|---------------------------------------------------------|---------------------------------------------------------|
| <b>Subcutaneous Adipose Tissue</b>  | ref                                           | Ref                                                     | Ref                                                     |
| Low (tertile 1)                     | 2.11 (0.72-6.17)                              | 0.35 (0.03-3.87)                                        | 0.21 (0.01-3.35)                                        |
| Middle (tertile 2)                  | 1.78 (0.61-5.18)                              | 3.39 (0.23-50.40)                                       | 11.53 (0.27-492.63)                                     |
| High (tertile 3)                    |                                               |                                                         |                                                         |
| <b>Intramuscular Adipose Tissue</b> | ref                                           | Ref                                                     | Ref                                                     |
| Low (tertile 1)                     | 0.63 (0.21-1.86)                              | 0.10 (0.10-1.05)                                        | 0.11 (0.01-1.26)                                        |
| Middle (tertile 2)                  | 1.36 (0.55-3.39)                              | 1.61 (0.36-7.23)                                        | 1.73 (0.36-8.26)                                        |
| High (tertile 3)                    |                                               |                                                         |                                                         |
| <b>Visceral Adipose Tissue</b>      | ref                                           | Ref                                                     | Ref                                                     |
| Low (tertile 1)                     | 1.18 (0.43-3.28)                              | 0.75 (0.13-4.48)                                        | 0.83 (0.14-4.98)                                        |
| Middle (tertile 2)                  | 1.50 (0.57-3.93)                              | 2.63 (0.30-22.84)                                       | 1.39 (0.32-6.07)                                        |
| High (tertile 3)                    |                                               |                                                         |                                                         |
| <b>Very-Low-Density Muscle</b>      | ref                                           | Ref                                                     | Ref                                                     |
| Low (tertile 1)                     | 0.87 (0.35-2.18)                              | 1.94 (0.17-22.25)                                       | 1.59 (0.13-19.71)                                       |
| Middle (tertile 2)                  | 0.71 (0.25-2.03)                              | 1.52 (0.13-17.72)                                       | 0.99 (0.06-17.27)                                       |
| High (tertile 3)                    |                                               |                                                         |                                                         |
| <b>Low-Density Muscle</b>           | ref                                           | Ref                                                     | Ref                                                     |
| Low (tertile 1)                     | 1.03 (0.37-2.88)                              | 5.36 (0.43-67.24)                                       | 9.43 (0.60-149.12)                                      |
| Middle (tertile 2)                  | 1.46 (0.54-3.97)                              | 6.21 (0.43-89.57)                                       | 0.93 (0.35-147.42)                                      |
| High (tertile 3)                    |                                               |                                                         |                                                         |
| <b>Normal-Density Muscle</b>        | ref                                           | Ref                                                     | Ref                                                     |
| Low (tertile 1)                     | 0.46 (0.16-1.36)                              | 8.33 (0.58-119.93)                                      | 6.98 (0.46-106.65)                                      |
| Middle (tertile 2)                  | 0.86 (0.35-2.15)                              | 0.79 (0.28-51.90)                                       | 5.26 (0.34-81.41)                                       |
| High (tertile 3)                    |                                               |                                                         |                                                         |
| <b>High-Density Muscle</b>          | ref                                           | Ref                                                     | Ref                                                     |
| Low (tertile 1)                     | 0.92 (0.35-2.44)                              | 2.01 (0.25-16.29)                                       | 2.10 (0.24-18.46)                                       |
| Middle (tertile 2)                  | 1.16 (0.44-3.04)                              | 1.86 (0.13-26.70)                                       | 1.42 (0.08-25.13)                                       |
| High (tertile 3)                    |                                               |                                                         |                                                         |
| <b>Very-High-Density Muscle</b>     |                                               |                                                         |                                                         |

|                              |                  |                     |                     |
|------------------------------|------------------|---------------------|---------------------|
| Low (tertile 1)              | ref              | Ref                 | Ref                 |
| Middle (tertile 2)           | 0.68 (0.24-1.93) | 0.52 (0.05-5.21)    | 0.42 (0.03-5.00)    |
| High (tertile 3)             | 0.80 (0.32-2.01) | 14.26 (0.65-311.83) | 18.13 (0.49-669.03) |
| <b>Total Adipose Tissue</b>  |                  |                     |                     |
| Low (tertile 1)              | ref              | Ref                 | Ref                 |
| Middle (tertile 2)           | 2.21 (0.76-6.47) | 0.77 (0.07-8.28)    | 0.38 (0.03-5.41)    |
| High (tertile 3)             | 1.95 (0.67-5.69) | 2.74 (0.20-36.73)   | 3.46 (0.20-60.68)   |
| <b>Total Skeletal Muscle</b> |                  |                     |                     |
| Low (tertile 1)              | ref              | Ref                 | Ref                 |
| Middle (tertile 2)           | 0.73 (0.25-2.12) | 6.51 (0.45-95.19)   | 13.36 (0.72-248.11) |
| High (tertile 3)             | 2.08 (0.77-5.58) | 2.20 (0.21-23.11)   | 2.48 (0.20-31.31)   |

<sup>a</sup> Model 2 is adjusted for age, race, disease stage, tumor grade, and tumor size

<sup>b</sup> Model 3 is adjusted for age, race, disease stage, tumor grade, tumor size, and adipose tissue (for skeletal muscles) or muscle (for adipose tissue)

TAT area = areas of SAT+IMAT+VAT

TSM area = areas of VLDM + LDM + NDM + HDM + VHDM

TNBC: triple-negative breast cancer

**Table S2. Odds ratio and 95% CI for the association between specific body composition components and TNBC subtype among patients with post-surgery CT scans (N=229)**

| <b>Body composition</b>             | <b>Model 1<br/>Unadjusted OR<br/>(95% CI)</b> | <b>Model 2<br/>Adjusted OR<sup>a</sup> (95%<br/>CI)</b> | <b>Model 3<br/>Adjusted OR<sup>b</sup> (95%<br/>CI)</b> |
|-------------------------------------|-----------------------------------------------|---------------------------------------------------------|---------------------------------------------------------|
| <b>Subcutaneous Adipose Tissue</b>  | Ref                                           | Ref                                                     | Ref                                                     |
| Low (tertile 1)                     | 2.01 (0.93-4.36)                              | 3.71 (1.09-12.64)*                                      | 6.00 (1.52-23.75)*                                      |
| Middle (tertile 2)                  | 3.13 (1.37-7.14)*                             | 4.78 (1.22-18.71)*                                      | 11.15 (2.20-59.15)*                                     |
| High (tertile 3)                    |                                               |                                                         |                                                         |
| <b>Intramuscular Adipose Tissue</b> | Ref                                           | Ref                                                     | Ref                                                     |
| Low (tertile 1)                     | 1.59 (0.74-3.42)                              | 2.31 (0.69-7.71)                                        | 2.67 (0.77-9.29)                                        |
| Middle (tertile 2)                  | 3.31 (1.42-7.72)*                             | 8.79 (1.83-42.11)*                                      | 11.31 (2.11-60.76)*                                     |
| High (tertile 3)                    |                                               |                                                         |                                                         |
| <b>Visceral Adipose Tissue</b>      | Ref                                           | Ref                                                     | Ref                                                     |
| Low (tertile 1)                     |                                               |                                                         |                                                         |
| Middle (tertile 2)                  | 3.75 (1.68-8.37)*                             | 4.36 (1.16-16.45)*                                      | 5.98 (1.43-24.92)*                                      |
| High (tertile 3)                    | 5.59 (2.39-13.10)*                            | 24.69 (4.90-124.43)*                                    | 39.73 (6.45-244.87)*                                    |
| <b>Very-Low-Density Muscle</b>      | Ref                                           | Ref                                                     | Ref                                                     |
| Low (tertile 1)                     |                                               |                                                         |                                                         |
| Middle (tertile 2)                  | 1.19 (0.52-2.69)                              | 2.60 (0.68-9.88)                                        | 2.93 (0.75-11.47)                                       |
| High (tertile 3)                    | 2.01 (0.92-4.36)                              | 4.25 (1.13-16.07)*                                      | 7.58 (1.54-37.25)*                                      |
| <b>Low-Density Muscle</b>           | Ref                                           | Ref                                                     | Ref                                                     |
| Low (tertile 1)                     |                                               |                                                         |                                                         |
| Middle (tertile 2)                  | 2.37 (1.03-5.46)*                             | 7.46 (1.83-30.34)*                                      | 4.31 (0.88-21.04)                                       |
| High (tertile 3)                    | 1.83 (0.86-3.92)                              | 8.73 (2.11-36.09)*                                      | 3.86 (0.71-20.97)                                       |
| <b>Normal-Density Muscle</b>        | Ref                                           | Ref                                                     | Ref                                                     |
| Low (tertile 1)                     |                                               |                                                         |                                                         |
| Middle (tertile 2)                  | 0.35 (0.15-0.82)                              | 0.52 (0.14-1.95)                                        | 0.36 (0.08-1.54)                                        |
| High (tertile 3)                    | 0.31 (0.13-0.71)                              | 0.17 (0.04-0.68)                                        | 0.16 (0.04-0.74)                                        |
| <b>High-Density Muscle</b>          | Ref                                           | Ref                                                     | Ref                                                     |
| Low (tertile 1)                     |                                               |                                                         |                                                         |
| Middle (tertile 2)                  | 0.92 (0.38-2.21)                              | 0.50 (0.12-2.15)                                        | 0.80 (0.14-4.69)                                        |
| High (tertile 3)                    | 0.94 (0.42-2.08)                              | 0.25 (0.06-0.98)                                        | 0.45 (0.08-2.46)                                        |
| <b>Very-High-Density Muscle</b>     |                                               |                                                         |                                                         |
| Low (tertile 1)                     | Ref                                           | Ref                                                     | Ref                                                     |

|                              |                    |                     |                      |
|------------------------------|--------------------|---------------------|----------------------|
| Middle (tertile 2)           | 1.02 (0.46-2.26)   | 0.72 (0.22-2.37)    | 0.74 (0.18-3.06)     |
| High (tertile 3)             | 1.32 (0.60-2.91)   | 0.57 (0.18-1.83)    | 0.14 (0.03-0.72)     |
| <b>Total Adipose Tissue</b>  |                    |                     |                      |
| Low (tertile 1)              | Ref                | Ref                 | Ref                  |
| Middle (tertile 2)           | 1.50 (0.72-3.10)   | 2.93 (1.05-8.21)*   | 4.18 (1.30-13.46)*   |
| High (tertile 3)             | 7.44 (2.62-21.14)* | 22.19 (5.25-93.85)* | 39.23 (7.67-200.58)* |
| <b>Total Skeletal Muscle</b> |                    |                     |                      |
| Low (tertile 1)              | Ref                | Ref                 | Ref                  |
| Middle (tertile 2)           | 2.00 (0.81-4.94)   | 0.89 (0.23-3.37)    | 0.49 (0.10-2.42)     |
| High (tertile 3)             | 0.72 (0.34-1.51)   | 0.74 (0.24-2.29)    | 0.24 (0.06-0.98)     |

<sup>a</sup> Model 2 is adjusted for age, race, disease stage, tumor grade, and tumor size

<sup>b</sup> Model 3 is adjusted for age, race, disease stage, tumor grade, tumor size, and adipose tissue (for skeletal muscles) or muscle (for adipose tissue)

TAT area = areas of SAT+IMAT+VAT

TSM area = areas of VLDM + LDM + NDM + HDM + VHDM

TNBC: triple-negative breast cancer

\*p <0.05

**Table S3. Four-category of body composition phenotype in relation to TNBC subtype, by the timing of CT scan.**

| <b>Body composition categories</b>              | <b>Model 1<br/>Unadjusted OR<br/>(95% CI)</b> | <b>Model 2<br/>Adjusted OR<sup>a</sup> (95%<br/>CI)</b> |
|-------------------------------------------------|-----------------------------------------------|---------------------------------------------------------|
| <b>CT scan taken before surgery<br/>(N=121)</b> | Ref                                           | Ref                                                     |
| Normal (Low adiposity, high muscle)             | 1.63 (0.28-9.41)                              | 7.62 (0.28-208.09)                                      |
| High adiposity, high muscle                     | 1.67 (0.26-10.77)                             | 2.91 (0.13-63.54)                                       |
| Low adiposity, low muscle                       | 1.00 (0.17-5.87)                              | 3.13 (0.19-51.17)                                       |
| High adiposity, low muscle                      |                                               |                                                         |
| <b>CT scan taken after surgery (N=229)</b>      |                                               |                                                         |
| Normal (Low adiposity, high muscle)             | Ref                                           | Ref                                                     |
| High adiposity, high muscle                     | 0.27 (0.06-1.30)                              | 0.26 (0.04-1.90)                                        |
| Low adiposity, low muscle                       | 0.36 (0.07-1.84)                              | 0.56 (0.08-4.23)                                        |
| High adiposity, low muscle                      | 2.42 (0.36-16.36)                             | 8.07 (0.74-88.21)                                       |

<sup>a</sup> Model 2 is adjusted for age, race, disease stage, tumor grade, and tumor size
